# Supplementary material for: In vivo stability of 211At-radiopharmaceuticals: on the impact of halogen bond formation
Source: Royal Society of Chemistry journal article supplement (doi:10.1039/d3md00579h), 2023-11-23
Supplement: d3md00579h1.pdf [file d3md00579h1.pdf]

## Electronic Supplementary Information (ESI)

# In vivo stability of $^{211}\text{At}$ -radiopharmaceuticals: on the impact of halogen bond formation

*Thibault Yssartier, Lu Liu, Sylvain Pardoue, Jean-Yves Le Questel, François Guérard, Gilles Montavon, Nicolas Galland*

### Table of contents:

|                                                                                                                                                                                                                                                                         |   |
|-------------------------------------------------------------------------------------------------------------------------------------------------------------------------------------------------------------------------------------------------------------------------|---|
| <b>Modelling of experimental data</b> .....                                                                                                                                                                                                                             | 2 |
| <b>Table S1</b> Calculated interaction distances and angles of XBs between astatobenzene and nucleophilic sites of amino acids, at the PW6B95/AVDZ level of theory, while interaction energies are determined at the PW6B95/TZVPD level of theory .....                 | 3 |
| <b>Fig. S1</b> Calculated electrostatic potential at the molecular surfaces, defined by 0.001 a.u. isovalue of the electron density, of iodobenzene and astatobenzene .....                                                                                             | 4 |
| <b>Fig. S2</b> Calculated structures at the PW6B95/AVDZ level of theory for the most stable XB complexes between PhAt and nucleophilic sites of the asparagine, serine, cysteine, cystine, selenocysteine, phenylalanine, tryptophan and histidine #2 amino acids ..... | 4 |
| <b>Fig. S3</b> Astatine distribution ratios $D$ as a function of the initial TMTU concentration in the organic phase .....                                                                                                                                              | 5 |
| <b>Fig. S4</b> Calculated interaction energy and charge transfer at the PW6B95/TZVPD level of theory, in the most stable XB complexes between PhAt and amino acid fragments .....                                                                                       | 5 |
| <b>Fig. S5</b> NPA charges (in e) of the ring carbon atoms in PhAt and EAB calculated at the PW6B95/TZVPD level of theory .....                                                                                                                                         | 6 |
| <b>Fig. S6</b> Condensed-to-atom dual descriptor of $C_{ipso}$ ( $\Delta f_C$ ) and interaction energy calculated at the PW6B95/TZVPD level of theory for the most stable XB complexes between PhAt and amino acid fragments .....                                      | 6 |
| <b>Fig. S7</b> Correlation for F, Cl, Br and I between their Coulomb radii used in SMD model and four sets of radii .....                                                                                                                                               | 7 |
| <b>Supplementary structures.</b> Cartesian coordinates (in angstroms) calculated at the PW6B95/AVDZ level of theory for all the complexes shown in the various figures, the Boltzmann populations come from the PW6B95/TZVPD calculations .....                         | 8 |

## Electronic Supplementary Information (ESI)

**Modelling of experimental data.** The objective is to reproduce the experimental curves displaying  $D$  variations by a thermodynamic model considering the chemical equilibria occurring in the biphasic system.

In the model 1 of  $D$  supposing the formation of a XB complex in the aqueous phase, the following equilibria was considered:

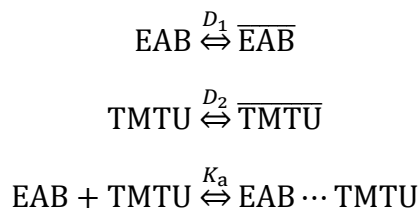

The overlined notation means that these species belong to the organic phase. Finally,  $D$  can be expressed as:

$$D_{\text{Model 1}} = \frac{D_1}{1 + K_a \times [\text{TMTU}] \times \frac{1}{2 + D_2}}$$

In the model 2 of  $D$  supposing the formation of a XB complex in the organic phase, the following equilibria was considered:

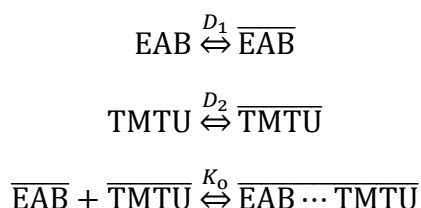

Therefore,  $D$  can be expressed as:

$$D_{\text{Model 2}} = D_1 \times (1 + K_o \times [\text{TMTU}] \times \frac{D_2}{2 + D_2})$$

Origin 9.0 was used to fit the experimental data, *i.e.* obtain the lines displayed in Fig. S2, in order to determine the unknown parameters:

| Model 1                         | Model 2                         |
|---------------------------------|---------------------------------|
| $D_1 = 10^{2.35}$               | $D_1 = 10^{2.35}$               |
| $D_2 = 10^{-0.37}$ <sup>a</sup> | $D_2 = 10^{-0.37}$ <sup>a</sup> |
| $K_a = 10^{0.5}$                | $K_o = 10^{1.0}$                |

<sup>a</sup> The  $D_2$  value was determined experimentally in a previous study.<sup>20</sup>

## Electronic Supplementary Information (ESI)

**Table S1** Calculated interaction distances and angles of XBs between astatobenzene and nucleophilic sites of amino acids, at the PW6B95/AVDZ level of theory, while interaction energies are determined at the PW6B95/TZVPD level of theory. <sup>a</sup>

| sites                 |                             | $E_{\text{int}}$ (kJ/mol) | $d_{\text{int}}$ (Å) | $\theta$ (°) |
|-----------------------|-----------------------------|---------------------------|----------------------|--------------|
| $\pi$                 | phenylalanine               | -6.4                      | -                    | 167.5        |
|                       | tyrosine                    | -7.1                      | -                    | 162.5        |
|                       | tryptophan                  | -8.3                      | -                    | 162.1        |
|                       | histidine                   | -8.7                      | -                    | 160.2        |
| N (sp <sup>2</sup> )  | peptide backbone            | -5.4                      | 3.368                | 174.4        |
|                       | asparagine                  | -6.6                      | 3.315                | 176.7        |
|                       | histidine                   | -20.5                     | 2.980                | 179.6        |
| O (sp <sup>2</sup> )  | peptide backbone            | -16.6                     | 2.972                | 178.9        |
|                       | asparagine                  | -18.5                     | 2.957                | 176.7        |
| O (sp <sup>3</sup> )  | tyrosine                    | -9.5                      | 3.160                | 179.0        |
|                       | serine                      | -12.6                     | 3.049                | 178.0        |
|                       | aspartate                   | -77.9                     | 2.597                | 175.0        |
| S (sp <sup>3</sup> )  | cystine                     | -9.9                      | 3.505                | 172.2        |
|                       | cysteine                    | -11.7                     | 3.496                | 175.6        |
|                       | methionine                  | -16.7                     | 3.405                | 171.9        |
| Se (sp <sup>3</sup> ) | selenocysteine              | -12.1                     | 3.585                | 175.3        |
|                       | deprotonated selenocysteine | -86.6                     | 3.075                | 177.5        |

<sup>a</sup> For a given type of interaction, there may be  $N$  stable conformers. In this case, the value of a property,  $A$ , is calculated from a weighting of each conformer  $i$  by its Boltzmann population  $p_i$ :

$$A = \sum_i^N \left( \frac{p_i}{\sum_j^N p_j} A_i \right).$$

## Electronic Supplementary Information (ESI)

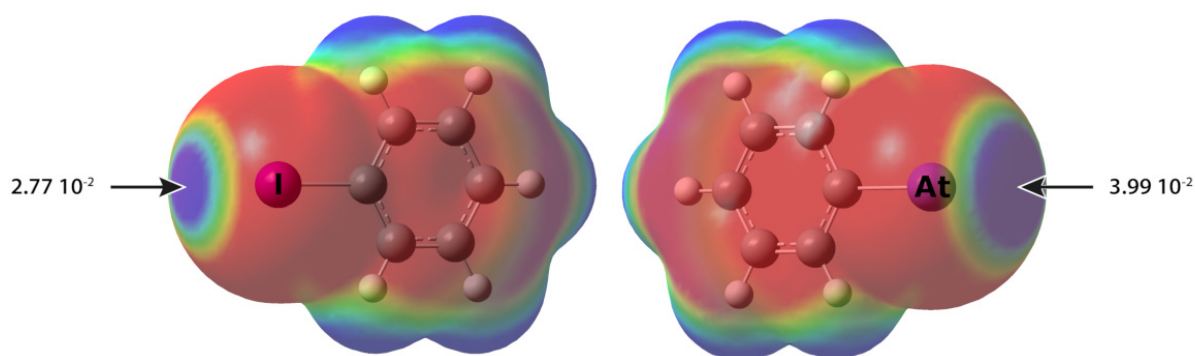

**Fig. S1** Calculated electrostatic potential at the molecular surfaces, defined by 0.001 a.u. isovalue of the electron density, of iodobenzene (left) and astatobenzene (right). Values of  $V_{S,\max}$  in a.u. come from PW6B95/TZVPD calculations. Color code: from red (lowest values) to blue (highest values).

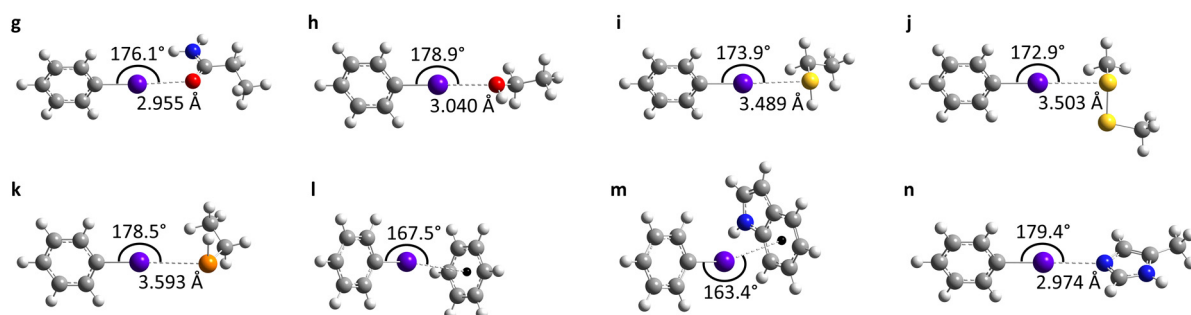

**Fig. S2** Calculated structures at the PW6B95/AVDZ level of theory for the most stable XB complexes between PhAt and nucleophilic sites of the asparagine (g), serine (h), cysteine (i), cysteine (j), selenocysteine (k), phenylalanine (l), tryptophan (m) and histidine #2 (n) amino acids. Atom color codes: purple for At, red for O, blue for N, yellow for S, orange for Se, gray for C, and white for H.

## Electronic Supplementary Information (ESI)

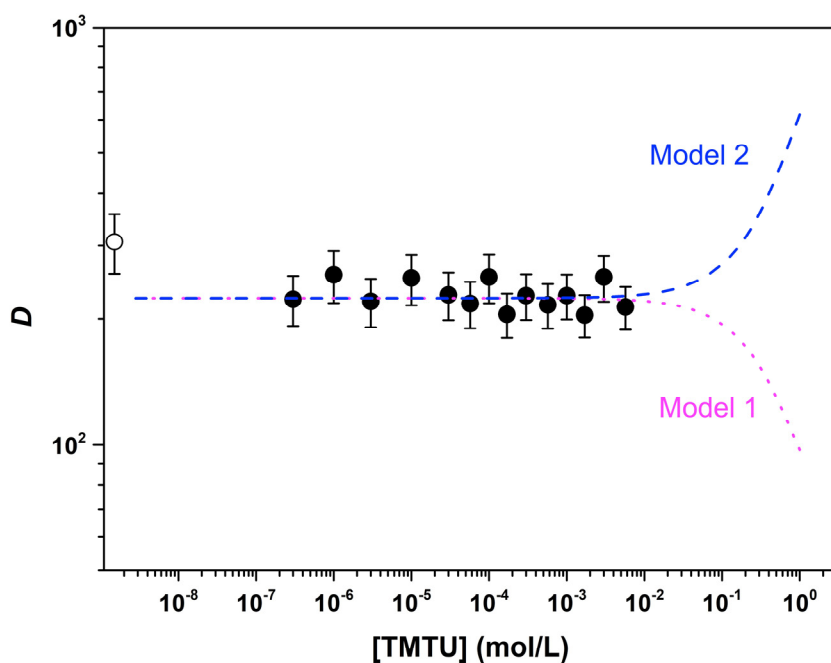

**Fig. S3** Astatine distribution ratios  $D$  as a function of the initial TMTU concentration in the organic phase. The hollows symbol indicates the  $D$  value in absence of TMTU in the biphasic system. The pink dotted line is the model 1 of  $D$  considering the formation of a XB complex in the aqueous phase with  $K_{EAB} = 10^{0.5}$ , while the blue dashed line is the model 2 of  $D$  considering the formation of a XB complex in the organic phase with  $K_{EAB} = 10^{1.0}$ .

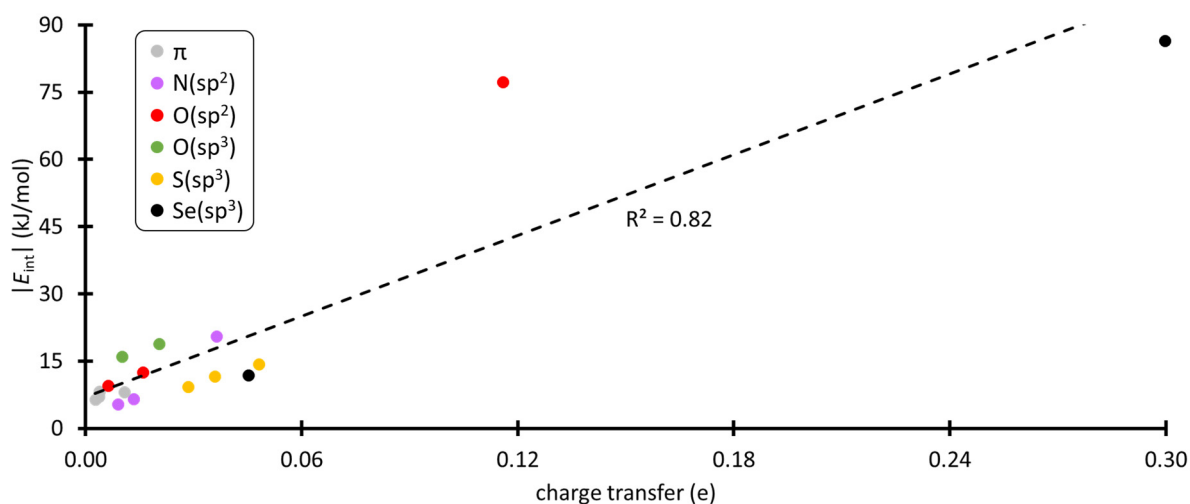

**Fig. S4** Calculated interaction energy and charge transfer at the PW6B95/TZVPD level of theory, in the most stable XB complexes between PhAt and amino acid fragments (data sorted according to the type of acceptor site).

## Electronic Supplementary Information (ESI)

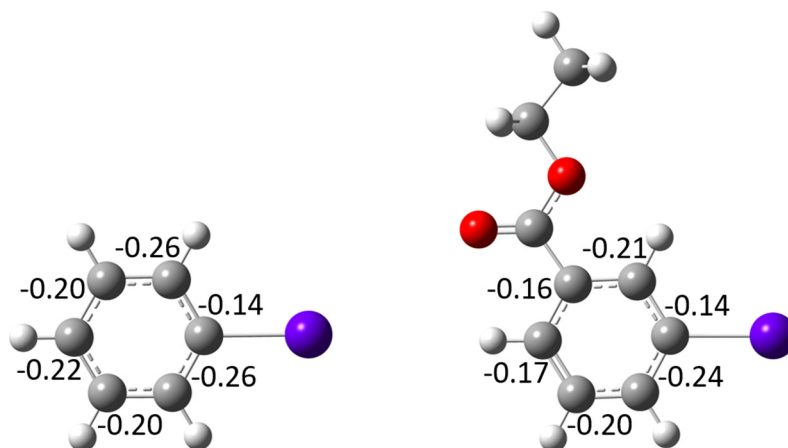

**Fig. S5** NPA charges (in e) of the ring carbon atoms in PhAt and EAB calculated at the PW6B95/TZVPD level of theory. EAB has four stable conformers and the presented values are calculated from a weighting of each conformer  $i$  by its Boltzmann population  $p_i$ :  $q = \sum_i^4 p_i q_i$ .

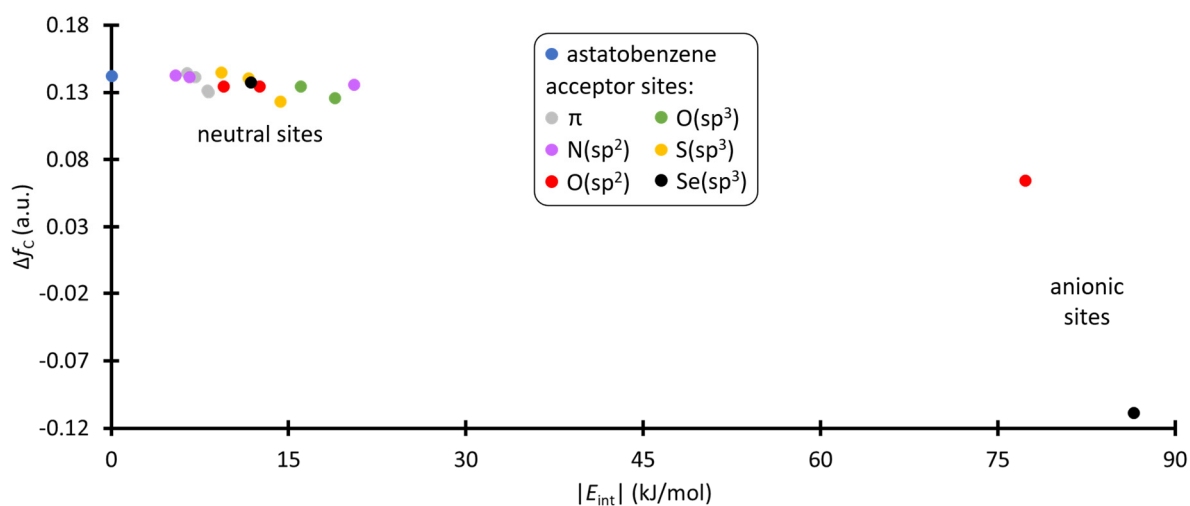

**Fig. S6** Condensed-to-atom dual descriptor of  $C_{ipso}$  ( $\Delta f_C$ ) and interaction energy calculated at the PW6B95/TZVPD level of theory for the most stable XB complexes between PhAt and amino acid fragments (data sorted according to the type of acceptor site).

## Electronic Supplementary Information (ESI)

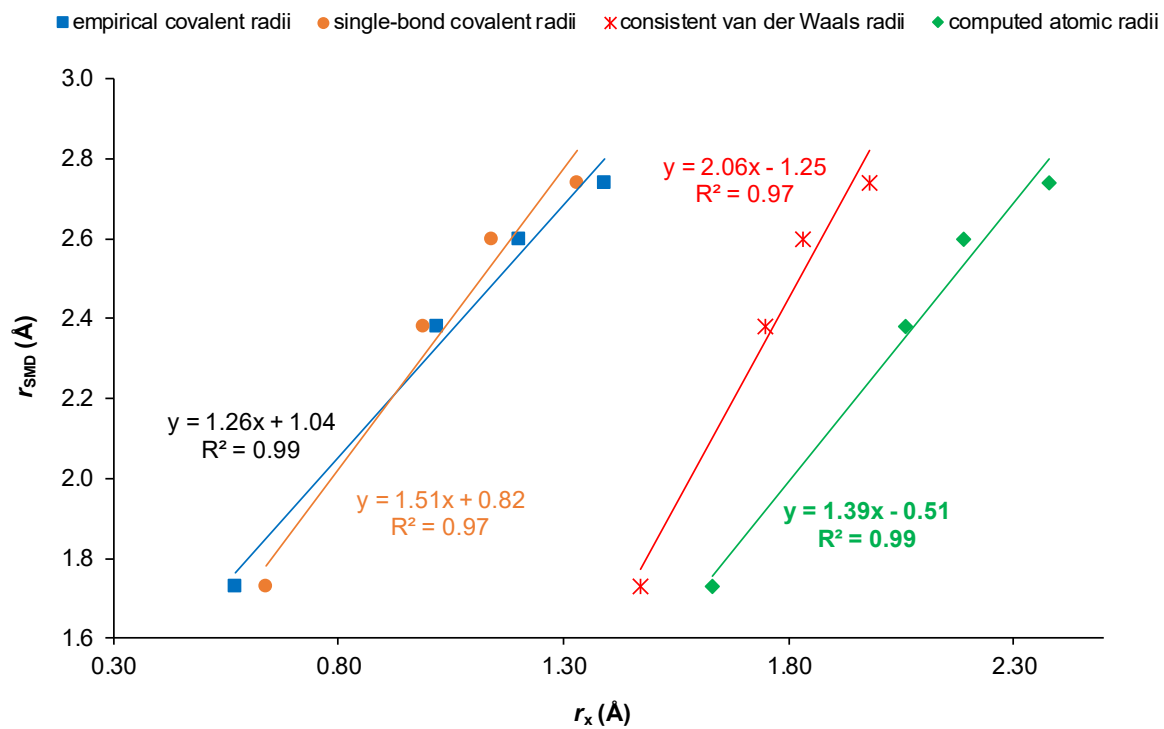

**Fig. S7** Correlation for F, Cl, Br and I between their Coulomb radii used in SMD model and four sets of radii (computed atomic radii, consistent van der Waals radii, revisited empirical covalent radii and single-bond covalent radii).

## Electronic Supplementary Information (ESI)

**Supplementary structures.** Cartesian coordinates (in angstroms) calculated at the PW6B95/AVDZ level of theory for all the complexes shown in the various figures, the Boltzmann populations come from the PW6B95/TZVPD calculations.

|                    |           |           |           |                    |           |           |           |
|--------------------|-----------|-----------|-----------|--------------------|-----------|-----------|-----------|
| Complex a, pop=24% |           |           |           | C                  | -3.372535 | 0.513983  | -1.181403 |
| C                  | 4.046616  | 0.175116  | 0.000000  | C                  | -3.449001 | 0.103293  | 1.197930  |
| O                  | 2.883033  | 0.559633  | -0.000002 | C                  | -4.728055 | 0.834156  | -1.164363 |
| N                  | 4.388692  | -1.135497 | 0.000002  | H                  | -2.818243 | 0.550343  | -2.115019 |
| H                  | 5.367553  | -1.364906 | 0.000004  | C                  | -4.804253 | 0.425182  | 1.204492  |
| C                  | 3.421614  | -2.209657 | 0.000003  | H                  | -2.954460 | -0.181052 | 2.122473  |
| H                  | 3.532176  | -2.835576 | 0.891500  | C                  | -5.446261 | 0.790768  | 0.026012  |
| H                  | 3.532178  | -2.835578 | -0.891494 | H                  | -5.221613 | 1.119015  | -2.090426 |
| H                  | 2.425412  | -1.765508 | 0.000001  | H                  | -5.357668 | 0.388647  | 2.139767  |
| C                  | 5.192014  | 1.153297  | 0.000000  | H                  | -6.503570 | 1.041265  | 0.035270  |
| H                  | 6.173146  | 0.670709  | 0.000002  |                    |           |           |           |
| H                  | 5.104110  | 1.793251  | 0.881592  | Complex c, pop=49% |           |           |           |
| H                  | 5.104112  | 1.793249  | -0.881594 | C                  | 3.328824  | -0.604560 | -0.000018 |
| C                  | -2.310012 | -0.026448 | 0.000000  | O                  | 2.940471  | -1.783242 | -0.000050 |
| C                  | -2.999365 | -0.114045 | 1.205920  | O                  | 2.605292  | 0.442222  | 0.000010  |
| C                  | -4.381065 | -0.290454 | 1.202181  | C                  | 4.848300  | -0.366764 | -0.000009 |
| C                  | -5.075235 | -0.379265 | 0.000002  | H                  | 5.250394  | -0.895855 | 0.873187  |
| C                  | -4.381066 | -0.290451 | -1.202178 | H                  | 5.250395  | -0.895800 | -0.873236 |
| C                  | -2.999367 | -0.114041 | -1.205919 | C                  | 5.278261  | 1.089679  | 0.000037  |
| H                  | -2.465712 | -0.045009 | 2.150025  | H                  | 6.372828  | 1.183971  | 0.000041  |
| H                  | -4.914738 | -0.357875 | 2.147347  | H                  | 4.882912  | 1.609559  | -0.878085 |
| H                  | -6.153276 | -0.516550 | 0.000002  | H                  | 4.882910  | 1.609505  | 0.878190  |
| H                  | -4.914741 | -0.357869 | -2.147344 | At                 | 0.023936  | 0.109480  | 0.000001  |
| H                  | -2.465715 | -0.045003 | -2.150024 | C                  | -2.274680 | 0.018753  | 0.000001  |
| At                 | -0.084640 | 0.257809  | -0.000001 | C                  | -2.943251 | -1.208487 | 0.000029  |
|                    |           |           |           | C                  | -3.048763 | 1.182153  | -0.000027 |
| Complex b, pop=80% |           |           |           | C                  | -4.335430 | -1.273812 | 0.000029  |
| C                  | 5.991298  | 0.002633  | -0.074342 | H                  | -2.367281 | -2.132272 | 0.000052  |
| C                  | 4.900864  | -0.859112 | -0.132505 | C                  | -4.441451 | 1.125072  | -0.000028 |
| C                  | 3.613318  | -0.343766 | -0.018925 | H                  | -2.556542 | 2.153318  | -0.000050 |
| C                  | 3.409912  | 1.022275  | 0.151605  | C                  | -5.092703 | -0.105449 | 0.000001  |
| C                  | 4.508414  | 1.870331  | 0.207949  | H                  | -4.830810 | -2.243719 | 0.000052  |
| C                  | 5.802970  | 1.369522  | 0.095840  | H                  | -5.020457 | 2.047591  | -0.000050 |
| H                  | 6.995562  | -0.403439 | -0.163469 | H                  | -6.179660 | -0.153468 | 0.000001  |
| H                  | 5.050564  | -1.929276 | -0.265777 |                    |           |           |           |
| H                  | 2.395870  | 1.402233  | 0.237618  |                    |           |           |           |
| H                  | 4.348307  | 2.937087  | 0.341224  |                    |           |           |           |
| H                  | 6.656597  | 2.039225  | 0.140780  |                    |           |           |           |
| O                  | 2.503838  | -1.142729 | -0.068336 |                    |           |           |           |
| H                  | 2.768525  | -2.057597 | -0.190252 |                    |           |           |           |
| At                 | -0.558948 | -0.365163 | -0.018042 |                    |           |           |           |
| C                  | -2.740004 | 0.149770  | 0.002391  |                    |           |           |           |



## Electronic Supplementary Information (ESI)

### Complex d, pop=74%

|    |           |           |           |
|----|-----------|-----------|-----------|
| C  | 3.691085  | -0.954259 | 1.351430  |
| H  | 3.617804  | -2.028385 | 1.163881  |
| H  | 4.643195  | -0.740668 | 1.846190  |
| H  | 2.854841  | -0.644605 | 1.986264  |
| S  | 3.609174  | -0.128171 | -0.258355 |
| C  | 3.715826  | 1.594729  | 0.289669  |
| H  | 4.668091  | 1.780159  | 0.795328  |
| H  | 3.657682  | 2.219352  | -0.605178 |
| H  | 2.879898  | 1.840567  | 0.952287  |
| At | 0.203603  | -0.101643 | -0.254497 |
| C  | -2.024353 | 0.026529  | 0.045513  |
| C  | -2.628373 | 1.265959  | 0.228880  |
| C  | -2.788996 | -1.135365 | 0.046157  |
| C  | -4.007120 | 1.339801  | 0.414227  |
| H  | -2.033273 | 2.175205  | 0.227927  |
| C  | -4.167157 | -1.052898 | 0.232152  |
| H  | -2.319632 | -2.104813 | -0.097663 |
| C  | -4.778923 | 0.182624  | 0.416455  |
| H  | -4.476811 | 2.310125  | 0.557007  |
| H  | -4.762579 | -1.962829 | 0.231888  |
| H  | -5.854195 | 0.243567  | 0.561070  |

### Complex f, pop=28%

|    |           |           |           |
|----|-----------|-----------|-----------|
| C  | 4.770837  | -1.671412 | -0.000132 |
| C  | 3.287285  | -1.349375 | -0.000095 |
| H  | 2.805372  | -1.783763 | 0.883436  |
| H  | 2.805355  | -1.783643 | -0.883675 |
| H  | 5.260082  | -1.245197 | 0.883391  |
| H  | 4.947580  | -2.758733 | -0.000206 |
| H  | 5.260063  | -1.245079 | -0.883608 |
| At | -0.112313 | 0.242713  | 0.000018  |
| C  | -2.438784 | -0.114438 | -0.000008 |
| C  | -3.337304 | 0.955442  | -0.000122 |
| C  | -2.970860 | -1.406221 | 0.000093  |
| C  | -4.716143 | 0.747402  | -0.000135 |
| H  | -2.957049 | 1.976752  | -0.000203 |
| C  | -4.347838 | -1.625860 | 0.000080  |
| H  | -2.298697 | -2.264138 | 0.000184  |
| C  | -5.228677 | -0.547328 | -0.000034 |
| H  | -5.393820 | 1.600629  | -0.000225 |
| H  | -4.735066 | -2.644329 | 0.000161  |
| H  | -6.303941 | -0.714182 | -0.000043 |
| Se | 2.942519  | 0.597111  | 0.000040  |

### Complex e, pop=63%

|    |           |           |           |
|----|-----------|-----------|-----------|
| C  | -4.987148 | -0.312291 | 0.000001  |
| C  | -3.700318 | -0.782972 | 0.000002  |
| C  | -3.565046 | 1.364282  | -0.000003 |
| N  | -4.883013 | 1.058332  | -0.000002 |
| H  | -5.644931 | 1.714807  | -0.000004 |
| H  | -5.941126 | -0.817435 | 0.000002  |
| H  | -3.198444 | 2.380763  | -0.000005 |
| N  | -2.826874 | 0.280008  | -0.000000 |
| C  | -3.218443 | -2.190093 | 0.000005  |
| H  | -2.600866 | -2.390342 | 0.881626  |
| H  | -4.059415 | -2.887912 | 0.000006  |
| H  | -2.600866 | -2.390346 | -0.881615 |
| At | 0.150944  | 0.112419  | -0.000000 |
| C  | 2.399912  | -0.000401 | 0.000000  |
| C  | 3.037110  | -1.238346 | -0.000004 |
| C  | 3.157857  | 1.167511  | 0.000004  |
| C  | 4.428497  | -1.305715 | -0.000004 |
| H  | 2.453651  | -2.155500 | -0.000007 |
| C  | 4.548994  | 1.095368  | 0.000005  |
| H  | 2.669066  | 2.138445  | 0.000008  |
| C  | 5.187997  | -0.140258 | 0.000001  |
| H  | 4.918378  | -2.276735 | -0.000007 |
| H  | 5.133594  | 2.012490  | 0.000008  |
| H  | 6.273448  | -0.194757 | 0.000001  |

### Complex g, pop=54%

|    |           |           |           |
|----|-----------|-----------|-----------|
| C  | 5.597027  | -0.835920 | -0.381849 |
| H  | 5.120832  | -1.033302 | -1.344754 |
| H  | 5.376264  | -1.681340 | 0.276007  |
| H  | 6.679816  | -0.784084 | -0.526011 |
| C  | 5.078171  | 0.461627  | 0.208861  |
| H  | 5.528929  | 0.663475  | 1.188050  |
| H  | 5.348435  | 1.311089  | -0.432453 |
| C  | 3.570960  | 0.480649  | 0.341087  |
| O  | 2.848451  | -0.268523 | -0.304862 |
| N  | 3.068441  | 1.395508  | 1.203942  |
| H  | 3.663116  | 2.008711  | 1.732139  |
| H  | 2.068062  | 1.486609  | 1.293455  |
| At | -0.102456 | -0.180249 | -0.176160 |
| C  | -2.334047 | 0.005223  | 0.017050  |
| C  | -3.030216 | 0.893816  | -0.796879 |
| C  | -3.017054 | -0.769790 | 0.949561  |
| C  | -4.413362 | 1.005664  | -0.674859 |
| H  | -2.501555 | 1.499846  | -1.527820 |
| C  | -4.400259 | -0.652942 | 1.066169  |
| H  | -2.478102 | -1.466296 | 1.586297  |
| C  | -5.101362 | 0.233973  | 0.255767  |
| H  | -4.952911 | 1.700896  | -1.313732 |
| H  | -4.929509 | -1.261339 | 1.795801  |
| H  | -6.180485 | 0.322741  | 0.348462  |

## Electronic Supplementary Information (ESI)

### Complex h, pop=52%

|    |           |           |           |
|----|-----------|-----------|-----------|
| C  | -5.547057 | 0.140857  | 0.542371  |
| C  | -4.076267 | 0.491876  | 0.571322  |
| H  | -3.632680 | 0.223263  | 1.534675  |
| H  | -3.930777 | 1.572410  | 0.431818  |
| H  | -5.691976 | -0.931807 | 0.702328  |
| H  | -6.082523 | 0.686323  | 1.326985  |
| H  | -5.999312 | 0.411523  | -0.419399 |
| H  | -3.672715 | -0.039035 | -1.269912 |
| O  | -3.322691 | -0.233689 | -0.396959 |
| At | -0.295527 | -0.100722 | -0.155980 |
| C  | 1.935003  | 0.031394  | 0.048998  |
| C  | 2.567543  | 1.267605  | -0.035696 |
| C  | 2.678940  | -1.125086 | 0.260319  |
| C  | 3.952573  | 1.343482  | 0.092187  |
| H  | 1.988848  | 2.172307  | -0.200768 |
| C  | 4.063544  | -1.040494 | 0.387093  |
| H  | 2.187388  | -2.091816 | 0.326784  |
| C  | 4.703326  | 0.191765  | 0.303575  |
| H  | 4.443830  | 2.311334  | 0.025444  |
| H  | 4.641960  | -1.946406 | 0.552171  |
| H  | 5.783647  | 0.254367  | 0.402845  |

|    |           |           |           |
|----|-----------|-----------|-----------|
| H  | -5.741129 | 0.774666  | -1.008107 |
| H  | -5.672788 | 0.993891  | 0.774046  |
| H  | -5.517337 | 2.402624  | -0.307246 |
| S  | -3.475264 | 1.210802  | -0.254481 |
| S  | -3.178726 | -0.832886 | -0.109141 |
| C  | -3.154547 | -1.098396 | 1.691445  |
| H  | -2.944479 | -2.163260 | 1.836054  |
| H  | -2.361359 | -0.502576 | 2.148718  |
| H  | -4.125288 | -0.857876 | 2.131087  |
| At | 0.282759  | -0.300708 | -0.182349 |
| C  | 2.475710  | 0.140129  | 0.028741  |
| C  | 3.410245  | -0.841312 | -0.283429 |
| C  | 2.887643  | 1.393062  | 0.469712  |
| C  | 4.768724  | -0.562675 | -0.151405 |
| H  | 3.088851  | -1.820020 | -0.628791 |
| C  | 4.248278  | 1.662472  | 0.598631  |
| H  | 2.157644  | 2.160211  | 0.712726  |
| C  | 5.190677  | 0.687339  | 0.289175  |
| H  | 5.498345  | -1.330901 | -0.396138 |
| H  | 4.568989  | 2.642690  | 0.943187  |
| H  | 6.251221  | 0.901201  | 0.390721  |

### Complex i, pop=45%

|    |           |           |           |
|----|-----------|-----------|-----------|
| C  | 5.136886  | -1.472083 | 0.687005  |
| C  | 3.780794  | -0.806831 | 0.801411  |
| S  | 3.560006  | 0.619595  | -0.325028 |
| H  | 3.633558  | -0.378313 | 1.797871  |
| H  | 2.963882  | -1.513790 | 0.629903  |
| H  | 5.943469  | -0.756754 | 0.871635  |
| H  | 5.219826  | -2.285477 | 1.417201  |
| H  | 5.283403  | -1.899173 | -0.310514 |
| H  | 3.674387  | -0.070493 | -1.480526 |
| At | 0.088745  | 0.304565  | -0.166068 |
| C  | -2.111959 | -0.107167 | 0.044857  |
| C  | -2.686764 | -1.168313 | -0.646435 |
| C  | -2.888912 | 0.702266  | 0.866790  |
| C  | -4.050471 | -1.418739 | -0.511566 |
| H  | -2.080987 | -1.800976 | -1.289382 |
| C  | -4.251832 | 0.444535  | 0.995682  |
| H  | -2.441256 | 1.531992  | 1.406911  |
| C  | -4.835273 | -0.614645 | 0.308350  |
| H  | -4.498094 | -2.248700 | -1.053110 |
| H  | -4.857641 | 1.078688  | 1.638555  |
| H  | -5.898764 | -0.812706 | 0.411098  |

### Complex k, pop=43%

|    |           |           |           |
|----|-----------|-----------|-----------|
| C  | 3.211415  | 2.236607  | 0.555995  |
| C  | 3.966365  | 0.957111  | 0.842636  |
| H  | 3.831597  | 0.634143  | 1.879790  |
| H  | 5.038993  | 1.063168  | 0.663318  |
| H  | 2.139683  | 2.116174  | 0.739475  |
| H  | 3.583542  | 3.043733  | 1.198774  |
| H  | 3.343359  | 2.549276  | -0.485013 |
| H  | 3.585033  | 0.042881  | -1.509894 |
| At | -0.219734 | -0.187386 | -0.094730 |
| C  | -2.456421 | 0.038778  | 0.023749  |
| C  | -3.127591 | 0.782336  | -0.941210 |
| C  | -3.158290 | -0.567037 | 1.060495  |
| C  | -4.511819 | 0.919168  | -0.864755 |
| H  | -2.580800 | 1.255706  | -1.752164 |
| C  | -4.542407 | -0.425013 | 1.129408  |
| H  | -2.635617 | -1.149116 | 1.814610  |
| C  | -5.221682 | 0.317041  | 0.168816  |
| H  | -5.034613 | 1.500763  | -1.620356 |
| H  | -5.089233 | -0.899712 | 1.940666  |
| H  | -6.301439 | 0.425490  | 0.225361  |
| Se | 3.348220  | -0.594372 | -0.202745 |

### Complex j, pop=67%

|   |           |          |           |
|---|-----------|----------|-----------|
| C | -5.288952 | 1.338199 | -0.189315 |
|---|-----------|----------|-----------|

## Electronic Supplementary Information (ESI)

### Complex l, pop=65%

|    |           |           |           |
|----|-----------|-----------|-----------|
| C  | 3.642161  | -0.179565 | 1.218971  |
| C  | 3.619569  | 1.058996  | 0.581725  |
| C  | 3.652800  | 1.126783  | -0.809066 |
| C  | 3.709225  | -0.042851 | -1.561782 |
| C  | 3.732084  | -1.280346 | -0.924792 |
| C  | 3.698464  | -1.349070 | 0.465098  |
| H  | 3.613540  | -0.232860 | 2.304259  |
| H  | 3.574188  | 1.972076  | 1.169793  |
| H  | 3.630685  | 2.092956  | -1.306420 |
| H  | 3.729931  | 0.010229  | -2.647142 |
| H  | 3.771106  | -2.193474 | -1.512986 |
| H  | 3.711701  | -2.315449 | 0.962323  |
| At | -0.032496 | 0.116165  | 0.161325  |
| C  | -2.259683 | -0.032298 | -0.033304 |
| C  | -2.870764 | -1.281015 | -0.014712 |
| C  | -3.015933 | 1.126205  | -0.171085 |
| C  | -4.255868 | -1.366539 | -0.135762 |
| H  | -2.277962 | -2.184852 | 0.093114  |
| C  | -4.400270 | 1.029214  | -0.291433 |
| H  | -2.536375 | 2.100760  | -0.185401 |
| C  | -5.022803 | -0.214479 | -0.274129 |
| H  | -4.733876 | -2.343062 | -0.121149 |
| H  | -4.991718 | 1.935234  | -0.399190 |
| H  | -6.102963 | -0.285763 | -0.368203 |

### Complex m, pop=50%

|    |           |           |           |
|----|-----------|-----------|-----------|
| C  | 3.370873  | 0.724642  | -0.671836 |
| C  | 3.257829  | 0.290293  | 0.671138  |
| C  | 3.040054  | -1.046450 | 1.008630  |
| C  | 2.933160  | -1.956612 | -0.031501 |
| C  | 3.042661  | -1.547578 | -1.373778 |
| C  | 3.261340  | -0.221426 | -1.701003 |
| C  | 3.575880  | 2.140508  | -0.635745 |
| C  | 3.578990  | 2.508010  | 0.680691  |
| H  | 2.954204  | -1.365411 | 2.044196  |
| H  | 2.761658  | -3.005613 | 0.194253  |
| H  | 2.949349  | -2.289192 | -2.162234 |
| H  | 3.339602  | 0.085383  | -2.740698 |
| H  | 3.703415  | 2.805450  | -1.478935 |
| H  | 3.701949  | 3.484729  | 1.128164  |
| N  | 3.391428  | 1.398154  | 1.469350  |
| H  | 3.334424  | 1.402507  | 2.471970  |
| At | -0.459138 | -0.465910 | 0.075436  |
| C  | -2.608230 | 0.162503  | -0.026220 |
| C  | -2.950581 | 1.336812  | -0.687720 |
| C  | -3.586834 | -0.624361 | 0.571281  |
| C  | -4.287181 | 1.724207  | -0.749669 |
| H  | -2.185095 | 1.950337  | -1.154431 |

|   |           |           |           |
|---|-----------|-----------|-----------|
| C | -4.920600 | -0.228262 | 0.503719  |
| H | -3.318550 | -1.541936 | 1.087198  |
| C | -5.273966 | 0.944569  | -0.155352 |
| H | -4.553888 | 2.642393  | -1.267512 |
| H | -5.685165 | -0.844427 | 0.970805  |
| H | -6.315571 | 1.249941  | -0.206111 |

### Complex n, pop=96%

|    |           |           |           |
|----|-----------|-----------|-----------|
| C  | -3.571146 | -0.038519 | -0.843373 |
| C  | -4.853987 | -0.023158 | -0.362506 |
| C  | -3.375128 | 0.062708  | 1.282074  |
| N  | -2.662896 | 0.015034  | 0.183967  |
| H  | -3.254862 | -0.085442 | -1.876604 |
| H  | -2.987467 | 0.112246  | 2.289542  |
| N  | -4.704162 | 0.042075  | 1.003982  |
| C  | -6.175425 | -0.062635 | -1.038614 |
| H  | -6.761857 | -0.938902 | -0.739219 |
| H  | -6.029258 | -0.112648 | -2.119525 |
| H  | -6.772162 | 0.830992  | -0.822484 |
| H  | -5.448901 | 0.069647  | 1.680331  |
| At | 0.307721  | 0.006883  | 0.039519  |
| C  | 2.558000  | -0.004046 | -0.048231 |
| C  | 3.260437  | 1.195552  | -0.127730 |
| C  | 3.251444  | -1.211224 | -0.023426 |
| C  | 4.652397  | 1.185483  | -0.182038 |
| H  | 2.727247  | 2.142592  | -0.147931 |
| C  | 4.643390  | -1.216395 | -0.077953 |
| H  | 2.711140  | -2.152427 | 0.038176  |
| C  | 5.347479  | -0.019258 | -0.157322 |
| H  | 5.193545  | 2.126885  | -0.244173 |
| H  | 5.177440  | -2.163673 | -0.058277 |
| H  | 6.433476  | -0.025157 | -0.199907 |

## Electronic Supplementary Information (ESI)

### Complex 1, pop=0%

|    |           |           |           |
|----|-----------|-----------|-----------|
| C  | 3.429285  | -1.364679 | -0.187408 |
| C  | 4.783007  | -1.038630 | -0.130561 |
| C  | 5.175647  | 0.239503  | 0.249141  |
| C  | 4.206910  | 1.182323  | 0.572832  |
| C  | 2.847907  | 0.862504  | 0.520503  |
| C  | 2.451079  | -0.428164 | 0.134893  |
| H  | 3.136951  | -2.368972 | -0.485309 |
| H  | 5.530280  | -1.787747 | -0.382025 |
| H  | 6.228930  | 0.501648  | 0.297869  |
| H  | 4.508921  | 2.182535  | 0.881413  |
| C  | 1.844890  | 1.926453  | 0.898917  |
| H  | 1.113739  | 1.505302  | 1.594952  |
| H  | 2.351444  | 2.760349  | 1.393813  |
| N  | 1.109052  | 2.431799  | -0.267835 |
| H  | 1.646147  | 2.483840  | -1.120542 |
| C  | -0.216670 | 2.328221  | -0.431629 |
| N  | -0.731503 | 2.303762  | -1.677341 |
| N  | -1.081451 | 2.317290  | 0.577523  |
| H  | -1.894310 | 1.669435  | 0.396751  |
| H  | -0.707997 | 2.317151  | 1.512648  |
| H  | -0.171350 | 1.850604  | -2.383570 |
| H  | -1.715280 | 2.043057  | -1.708986 |
| At | 0.180354  | -0.907657 | -0.038539 |
| Se | -2.910694 | -0.190778 | -0.529062 |
| C  | -3.929079 | -0.507284 | 1.139380  |
| C  | -5.177511 | 0.348594  | 1.226228  |
| H  | -4.187938 | -1.570038 | 1.150496  |
| H  | -3.268803 | -0.322203 | 1.993362  |
| H  | -5.838361 | 0.161906  | 0.373684  |
| H  | -5.736740 | 0.132145  | 2.146971  |
| H  | -4.927571 | 1.415321  | 1.222228  |

### Complex 2, pop=0%

|   |          |           |           |
|---|----------|-----------|-----------|
| C | 3.316164 | -1.422854 | -0.187303 |
| C | 4.675205 | -1.126651 | -0.099255 |
| C | 5.087077 | 0.142555  | 0.290095  |
| C | 4.132053 | 1.106428  | 0.592073  |
| C | 2.768077 | 0.815649  | 0.508395  |
| C | 2.350826 | -0.465864 | 0.113198  |
| H | 3.009475 | -2.420804 | -0.492433 |
| H | 5.411691 | -1.891828 | -0.333867 |
| H | 6.144494 | 0.381494  | 0.363066  |
| H | 4.448856 | 2.099888  | 0.907733  |
| C | 1.779649 | 1.901247  | 0.863508  |
| H | 1.024201 | 1.497635  | 1.544019  |
| H | 2.292274 | 2.726370  | 1.366675  |
| N | 1.080273 | 2.417935  | -0.321328 |
| H | 1.635609 | 2.448086  | -1.163387 |

|    |           |           |           |
|----|-----------|-----------|-----------|
| C  | -0.243151 | 2.344736  | -0.511708 |
| N  | -0.732392 | 2.323692  | -1.768584 |
| N  | -1.128329 | 2.366572  | 0.479231  |
| H  | -0.779786 | 2.355990  | 1.424234  |
| H  | -1.958389 | 1.751959  | 0.291792  |
| H  | -0.171436 | 1.843870  | -2.456429 |
| H  | -1.721367 | 2.092505  | -1.820420 |
| At | 0.063638  | -0.886393 | -0.107586 |
| H  | -3.674766 | 0.000484  | 3.284169  |
| C  | -3.213293 | 0.273078  | 2.325392  |
| C  | -3.848000 | -0.486453 | 1.176638  |
| H  | -3.337979 | 1.355641  | 2.197395  |
| H  | -2.140295 | 0.052336  | 2.394936  |
| H  | -4.904473 | -0.219498 | 1.076808  |
| H  | -3.795467 | -1.564328 | 1.354729  |
| Se | -3.007541 | -0.159266 | -0.586636 |

### Complex 3, pop=0%

|    |           |           |           |
|----|-----------|-----------|-----------|
| C  | -3.265011 | -1.332038 | 0.712763  |
| C  | -4.596014 | -0.997265 | 0.954998  |
| C  | -5.067883 | 0.266723  | 0.620339  |
| C  | -4.200989 | 1.186650  | 0.042291  |
| C  | -2.865983 | 0.856890  | -0.205163 |
| C  | -2.387561 | -0.419497 | 0.133183  |
| H  | -2.911520 | -2.326000 | 0.977762  |
| H  | -5.264355 | -1.728596 | 1.403808  |
| H  | -6.104687 | 0.535161  | 0.803380  |
| H  | -4.567274 | 2.175589  | -0.231271 |
| C  | -1.976092 | 1.898466  | -0.841125 |
| H  | -1.416780 | 1.449422  | -1.667025 |
| H  | -2.580804 | 2.719116  | -1.237998 |
| N  | -0.999504 | 2.437465  | 0.116569  |
| H  | -1.335725 | 2.513763  | 1.065112  |
| C  | 0.328187  | 2.322339  | -0.007776 |
| N  | 1.098219  | 2.314367  | 1.098682  |
| N  | 0.952695  | 2.295047  | -1.180785 |
| H  | 1.792803  | 1.672066  | -1.180793 |
| H  | 0.390483  | 2.289880  | -2.015941 |
| H  | 0.702434  | 1.864240  | 1.910455  |
| H  | 2.064139  | 2.050258  | 0.923751  |
| At | -0.132874 | -0.912955 | -0.222053 |
| Se | 2.970136  | -0.308286 | -0.562445 |
| C  | 3.315365  | -0.340757 | 1.388447  |
| C  | 4.403769  | 0.626264  | 1.815323  |
| H  | 2.374644  | -0.139300 | 1.919076  |
| H  | 3.603607  | -1.365791 | 1.639254  |
| H  | 4.143257  | 1.667423  | 1.582623  |
| H  | 4.593854  | 0.559393  | 2.895432  |
| H  | 5.338979  | 0.411470  | 1.289076  |

## Electronic Supplementary Information (ESI)

|                    |           |           |           |                    |           |           |           |
|--------------------|-----------|-----------|-----------|--------------------|-----------|-----------|-----------|
| Complex 4, pop=40% |           |           |           | C                  | 1.512871  | -0.962162 | 1.355244  |
| C                  | 1.690552  | 2.366364  | -0.479303 | N                  | 2.657770  | -1.078511 | 2.032402  |
| C                  | 0.698905  | 3.339216  | -0.505579 | N                  | 0.334360  | -1.248918 | 1.942333  |
| C                  | -0.566290 | 3.055243  | 0.000013  | H                  | 0.303565  | -1.454625 | 2.924840  |
| C                  | -0.832958 | 1.801459  | 0.526793  | H                  | -0.537710 | -1.019560 | 1.491964  |
| C                  | 0.150339  | 0.804165  | 0.565308  | H                  | 3.490533  | -0.630921 | 1.569140  |
| C                  | 1.408674  | 1.112049  | 0.054860  | H                  | 2.630622  | -1.142156 | 3.036328  |
| H                  | 2.677729  | 2.586821  | -0.874273 | At                 | -3.054045 | -0.611090 | -0.188464 |
| H                  | 0.920244  | 4.317901  | -0.923111 | Se                 | 4.538169  | 0.582107  | -0.067629 |
| H                  | -1.346520 | 3.810834  | -0.015372 | C                  | 5.417613  | -0.939215 | -0.982895 |
| H                  | -1.822471 | 1.570974  | 0.922039  | C                  | 4.496343  | -2.111913 | -1.259976 |
| C                  | -0.234727 | -0.530486 | 1.165343  | H                  | 5.833064  | -0.553879 | -1.919159 |
| H                  | 0.597822  | -1.239561 | 1.117239  | H                  | 6.258771  | -1.254986 | -0.357968 |
| H                  | -0.469180 | -0.398317 | 2.225314  | H                  | 3.669639  | -1.814283 | -1.915922 |
| N                  | -1.414934 | -1.108034 | 0.559740  | H                  | 5.034768  | -2.934529 | -1.751369 |
| H                  | -2.384047 | -0.851357 | 0.927077  | H                  | 4.060295  | -2.503914 | -0.332514 |
| C                  | -1.438245 | -1.670665 | -0.635754 | Complex 6, pop=24% |           |           |           |
| N                  | -2.603843 | -2.152424 | -1.083788 | C                  | 4.149474  | 0.838668  | -0.398755 |
| N                  | -0.321949 | -1.800030 | -1.374810 | C                  | 4.718669  | 2.107406  | -0.467246 |
| H                  | -0.338168 | -2.326041 | -2.229633 | C                  | 3.962604  | 3.227547  | -0.145342 |
| H                  | 0.557712  | -1.408077 | -1.078478 | C                  | 2.637669  | 3.072165  | 0.242512  |
| H                  | -3.443068 | -1.832008 | -0.542136 | C                  | 2.047771  | 1.808792  | 0.319802  |
| H                  | -2.709843 | -2.314865 | -2.071572 | C                  | 2.823997  | 0.693389  | -0.007669 |
| At                 | 3.112918  | -0.370974 | 0.046459  | H                  | 4.745461  | -0.034996 | -0.645845 |
| Se                 | -4.477109 | -0.331964 | 0.870813  | H                  | 5.756873  | 2.212555  | -0.770685 |
| C                  | -4.147535 | 0.900774  | -0.646413 | H                  | 4.401184  | 4.219965  | -0.194736 |
| C                  | -5.167047 | 0.748831  | -1.759933 | H                  | 2.041173  | 3.945745  | 0.497539  |
| H                  | -4.163241 | 1.925454  | -0.258382 | C                  | 0.605987  | 1.693822  | 0.729405  |
| H                  | -3.135000 | 0.724284  | -1.038466 | H                  | 0.496888  | 0.896190  | 1.474896  |
| H                  | -6.179439 | 0.929724  | -1.385652 | H                  | 0.281816  | 2.637473  | 1.185209  |
| H                  | -4.972034 | 1.453517  | -2.581250 | N                  | -0.218652 | 1.367540  | -0.422023 |
| H                  | -5.151776 | -0.267989 | -2.169980 | H                  | 0.178675  | 1.502990  | -1.336726 |
| Complex 5, pop=32% |           |           |           | C                  | -1.451562 | 0.829864  | -0.348181 |
| C                  | -2.164955 | 2.363524  | 0.218273  | N                  | -2.069520 | 0.689324  | 0.813467  |
| C                  | -1.343816 | 3.481442  | 0.296030  | H                  | -3.013149 | 0.190427  | 0.790248  |
| C                  | 0.021136  | 3.358741  | 0.052095  | H                  | -1.688716 | 1.082545  | 1.655549  |
| C                  | 0.556116  | 2.121392  | -0.269610 | At                 | 1.993488  | -1.392499 | 0.103380  |
| C                  | -0.252912 | 0.980951  | -0.361902 | N                  | -2.083872 | 0.442935  | -1.454557 |
| C                  | -1.614271 | 1.127207  | -0.108907 | H                  | -6.198899 | 1.011620  | -1.273635 |
| H                  | -3.228941 | 2.456710  | 0.414362  | C                  | -5.571086 | 1.061643  | -0.378210 |
| H                  | -1.775100 | 4.445924  | 0.550862  | Se                 | -4.761474 | -0.728627 | -0.120392 |
| H                  | 0.670325  | 4.227636  | 0.111536  | C                  | -6.391478 | 1.512462  | 0.815595  |
| H                  | 1.625735  | 2.018345  | -0.455249 | H                  | -4.771646 | 1.786077  | -0.584343 |
| C                  | 0.417229  | -0.325149 | -0.733267 | H                  | -5.770417 | 1.577313  | 1.716066  |
| H                  | -0.292257 | -1.157594 | -0.692893 | H                  | -6.845097 | 2.498551  | 0.638548  |
| H                  | 0.773181  | -0.272481 | -1.766001 | H                  | -7.194944 | 0.798704  | 1.024826  |
| N                  | 1.576289  | -0.614629 | 0.080410  | H                  | -3.005361 | -0.055685 | -1.301215 |
| H                  | 2.528532  | -0.233232 | -0.205718 | H                  | -1.558189 | 0.293154  | -2.299360 |

## Electronic Supplementary Information (ESI)

Complex 7, pop=4%

|    |           |           |           |
|----|-----------|-----------|-----------|
| C  | 1.708605  | 2.370740  | -0.420172 |
| C  | 0.720821  | 3.345856  | -0.480718 |
| C  | -0.571448 | 3.052734  | -0.054807 |
| C  | -0.866449 | 1.788469  | 0.429509  |
| C  | 0.112570  | 0.789628  | 0.504414  |
| C  | 1.397017  | 1.105566  | 0.070463  |
| H  | 2.715963  | 2.597344  | -0.756359 |
| H  | 0.965551  | 4.332782  | -0.864319 |
| H  | -1.349963 | 3.808917  | -0.100357 |
| H  | -1.877382 | 1.548347  | 0.758341  |
| C  | -0.304482 | -0.555805 | 1.058069  |
| H  | 0.524858  | -1.269447 | 1.023951  |
| H  | -0.576004 | -0.446644 | 2.111882  |
| N  | -1.465643 | -1.107333 | 0.396517  |
| H  | -2.447115 | -0.855241 | 0.739099  |
| C  | -1.450733 | -1.637000 | -0.813392 |
| N  | -2.602809 | -2.100595 | -1.314721 |
| N  | -0.313042 | -1.739846 | -1.525012 |
| H  | -0.293751 | -2.287533 | -2.366399 |
| H  | 0.566009  | -1.404933 | -1.163811 |
| H  | -3.456028 | -1.767413 | -0.805314 |
| H  | -2.674584 | -2.211294 | -2.313272 |
| At | 3.092088  | -0.386248 | 0.111919  |
| Se | -4.572624 | -0.488816 | 0.790072  |
| C  | -4.659593 | 1.187707  | -0.263769 |
| C  | -3.986869 | 1.110819  | -1.621922 |
| H  | -5.721004 | 1.424223  | -0.386064 |
| H  | -4.221764 | 1.995196  | 0.334396  |
| H  | -4.439024 | 0.319841  | -2.231753 |
| H  | -4.084252 | 2.058031  | -2.171690 |
| H  | -2.915933 | 0.890784  | -1.527438 |
